# Supplementary material
Source: HighWire-hosted journal article supplement (https://bmjopen.bmj.com/content/11/7/e045700)
Supplement: inline-supplementary-material-2 [file inline-supplementary-material-2.pdf]

Table 1 Concepts and Search Items

| Databases      | Search items                                                                                                                                                                                                                                                                                                                                                                                                                                                                                                                                                                                                                                                                                                                                                                                                                                                                                                                                                                                                                                                                                    |
|----------------|-------------------------------------------------------------------------------------------------------------------------------------------------------------------------------------------------------------------------------------------------------------------------------------------------------------------------------------------------------------------------------------------------------------------------------------------------------------------------------------------------------------------------------------------------------------------------------------------------------------------------------------------------------------------------------------------------------------------------------------------------------------------------------------------------------------------------------------------------------------------------------------------------------------------------------------------------------------------------------------------------------------------------------------------------------------------------------------------------|
| JSTOR          | #1: (“body image” (Title/Abstract) OR “body dissatisfaction” (Title/Abstract) OR “body image disturbance*” (Title/Abstract) OR “body concern*” (Title/Abstract) OR “body satisfaction” (Title/Abstract) OR “body dysphoria” (Title/Abstract) OR “appearance evaluation” (Title/Abstract)))                                                                                                                                                                                                                                                                                                                                                                                                                                                                                                                                                                                                                                                                                                                                                                                                      |
| PsycARTICLES   | #2: (“antiretroviral therapy adherence” (Title/Abstract) OR “antiretroviral therapy non-adherence” (Title/Abstract) OR “antiretroviral therapy nonadherence” (Title/Abstract) OR “antiretroviral treatment adherence” (Title/Abstract) OR “antiretroviral treatment non-adherence” (Title/Abstract) OR “antiretroviral treatment nonadherence” (Title/Abstract) OR “antiretroviral therapy uptake adherence” (Title/Abstract) OR “antiretroviral therapy uptake non-adherence” (Title/Abstract) OR “antiretroviral therapy uptake nonadherence” (Title/Abstract) OR “ART adherence” (Title/Abstract) OR “ART non-adherence” (Title/Abstract) OR “ART nonadherence” (Title/Abstract) OR “nucleoside reverse transcriptase inhibitor*” (Title/Abstract) OR “nucleotide reverse transcriptase inhibitor*” (Title/Abstract) OR “non-nucleoside reverse transcriptase inhibitor*” (Title/Abstract) OR “nonnucleoside reverse transcriptase inhibitor” (Title/Abstract) OR “protease inhibitor*” (Title/Abstract) OR “integrase inhibitor*” (Title/Abstract) OR “entry inhibitor*” (Title/Abstract))) |
| PubMed         | #3: (“HIV” (Title/Abstract) OR “AIDS” (Title/Abstract) OR “HIV/AIDS” (Title/Abstract)))                                                                                                                                                                                                                                                                                                                                                                                                                                                                                                                                                                                                                                                                                                                                                                                                                                                                                                                                                                                                         |
| ScienceDirect  | #4: #1 AND #2 AND #3                                                                                                                                                                                                                                                                                                                                                                                                                                                                                                                                                                                                                                                                                                                                                                                                                                                                                                                                                                                                                                                                            |
| Web of Science |                                                                                                                                                                                                                                                                                                                                                                                                                                                                                                                                                                                                                                                                                                                                                                                                                                                                                                                                                                                                                                                                                                 |

JSTOR, Journal Storage; PsycINFO, Psychology Information.
